# Supplementary material
Source: publisher figshare collection journal article supplement (https://sage.figshare.com/ndownloader/files/17937692)
Supplement: Supplementary file 1 [file 17937692]

Appendix 2. Adolescent and parent knowledge on statements associated with concussion, concussion signs and symptoms, recognition, and concussion management

|                                                                                                 | Adolescents<br>(n=113) |                 |                     | Parents<br>(n=151) |                 |                     |
|-------------------------------------------------------------------------------------------------|------------------------|-----------------|---------------------|--------------------|-----------------|---------------------|
|                                                                                                 | <i>Agree</i>           | <i>Disagree</i> | <i>Neither</i>      | <i>Agree</i>       | <i>Disagree</i> | <i>Neither</i>      |
| <b>Sports-related concussion statements (%)</b>                                                 |                        |                 |                     |                    |                 |                     |
| A concussion is a serious injury                                                                | 98.2                   | 0.0             | 1.8                 | 99.4               | 0.7             | 0.0                 |
| An underage player with suspected concussion should not return to play that day                 | 92.1                   | 2.7             | 5.3                 | 96.0               | 3.3             | 0.7                 |
| Long term complications include memory loss, confusion, personality changes, movement disorders | 78.8                   | 9.7             | 11.5                | 92.7               | 2.0             | 5.3                 |
| A concussion could result in death                                                              | 77.0                   | 15.1            | 8.0                 | 82.5               | 5.3             | 11.9                |
| A player can become concussed without having received a direct blow to the head                 | 54.0                   | 31.9            | 14.2                | 62.9               | 17.3            | 19.9                |
| Concussion symptoms are always immediately present after the injury occurs                      | 45.2                   | 44.2            | 10.6                | 21.2               | 69.2            | 10.6                |
| Loss of consciousness is necessary to be concussed                                              | 27.4                   | 61.9            | 10.6                | 26.5               | 68.9            | 4.6                 |
| <b>Sports-related concussion management (%)</b>                                                 | <i>Agree</i>           | <i>Disagree</i> | <i>Neither</i>      | <i>Agree</i>       | <i>Disagree</i> | <i>Neither</i>      |
| Adolescent player needs complete rest for 24 hours                                              | 91.1                   | 3.5             | 5.4                 | 80.8               | 6.6             | 12.6                |
| A standardized return to play protocol exists                                                   | 70.8                   | 18.6            | 10.6                | 58.3               | 18.5            | 23.2                |
| Medical professional can provide rehabilitation                                                 | 72.5                   | 15.0            | 12.4                | 47.0               | 28.5            | 24.5                |
| Rehabilitation is pointless as only time will fix a concussion                                  | 40.7                   | 35.4            | 23.9                | 35.7               | 28.5            | 35.8                |
| <b>True signs &amp; symptoms (%)</b>                                                            | <i>Yes</i>             | <i>No</i>       | <i>I don't know</i> | <i>Yes</i>         | <i>No</i>       | <i>I don't know</i> |
| Dizziness                                                                                       | 100.0                  | 0.0             | 0.0                 | 96.0               | 2.6             | 1.3                 |
| Headache                                                                                        | 99.1                   | 0.9             | 0.0                 | 95.4               | 3.3             | 1.3                 |
| Confusion                                                                                       | 98.2                   | 0.9             | 0.9                 | 96.0               | 4.0             | 0.0                 |
| Feeling in a cloud/haze                                                                         | 92.9                   | 0.9             | 6.2                 | 94.0               | 0.7             | 5.3                 |
| Poor balance                                                                                    | 92.0                   | 5.3             | 2.7                 | 96.0               | 1.3             | 2.6                 |
| Double Vision                                                                                   | 91.2                   | 3.5             | 5.3                 | 95.4               | 0.7             | 4.0                 |
| Memory loss                                                                                     | 85.8                   | 8.8             | 5.3                 | 89.4               | 4.6             | 6.0                 |
| Fatigue                                                                                         | 85.0                   | 7.1             | 8.0                 | 82.1               | 9.9             | 7.9                 |
| Slurred speech                                                                                  | 83.2                   | 8.8             | 8.0                 | 80.1               | 7.9             | 11.9                |

|                                                                        |                   |                  |                            |                   |                  |                            |
|------------------------------------------------------------------------|-------------------|------------------|----------------------------|-------------------|------------------|----------------------------|
| <b>Nausea</b>                                                          | 73.5              | 16.8             | 9.7                        | 86.8              | 7.3              | 6.0                        |
| <b>Sensitivity to light</b>                                            | 70.8              | 15.0             | 14.2                       | 74.8              | 9.3              | 15.9                       |
| <b>Increased emotional behaviour (sad, angry, scared, worried etc)</b> | 60.2              | 16.8             | 23.0                       | 55.6              | 16.6             | 27.8                       |
| <b>Vomiting</b>                                                        | 54.9              | 29.2             | 15.9                       | 76.8              | 14.6             | 8.6                        |
| <b>Agitation</b>                                                       | 48.7              | 34.5             | 16.8                       | 62.9              | 14.6             | 22.5                       |
| <b>False signs &amp; symptoms (%)</b>                                  | <b><i>Yes</i></b> | <b><i>No</i></b> | <b><i>I don't know</i></b> | <b><i>Yes</i></b> | <b><i>No</i></b> | <b><i>I don't know</i></b> |
| <b>Bruising on the face</b>                                            | 13.3              | 69.9             | 16.8                       | 24.5              | 49.0             | 26.5                       |
| <b>Bleeding from the head/face</b>                                     | 12.4              | 71.7             | 15.9                       | 27.8              | 42.4             | 29.8                       |
| <b>Increased thirst</b>                                                | 9.7               | 68.1             | 22.1                       | 20.5              | 35.8             | 43.7                       |
| <b>Excessive sweating</b>                                              | 6.2               | 75.2             | 18.6                       | 21.9              | 35.8             | 42.4                       |
| <b>Increased need to use the toilet</b>                                | 4.4               | 72.6             | 23.0                       | 9.3               | 39.1             | 51.7                       |
| <b>Toothache</b>                                                       | 2.7               | 80.5             | 16.8                       | 7.3               | 55.6             | 37.1                       |
| <b>Loss of smell</b>                                                   | 2.7               | 76.1             | 21.2                       | 18.5              | 40.4             | 41.1                       |
